# Supplementary material
Source: publisher figshare collection journal article supplement (https://asha.figshare.com/articles/dataset/_/9989816)
Supplement: Supplementary file 2 [file 1]

## Supplemental Material S1

Details about every child’s PCC, phonetic inventory and phonological processes

### Participants in the Tabletop Intervention

*Table S1.1 - DC individual PCC, phonetic inventory and percentage of occurrence of phonological processes*

|                        | T1                                                                                                     | T2                                                                                                      | T3                                                                                                     |
|------------------------|--------------------------------------------------------------------------------------------------------|---------------------------------------------------------------------------------------------------------|--------------------------------------------------------------------------------------------------------|
| PCC                    | 59.79%                                                                                                 | 61.34%                                                                                                  | 72.68%                                                                                                 |
| Phonetic Inventory     | /b, p, d, t, g, k, s, m, n, ɲ, ʀ/                                                                      | Added /f, v, z/                                                                                         | Added /ʒ, ʃ, l, ʀ/                                                                                     |
| Phonological processes | STOP(4.35%);<br>DEP(76.47%);<br>GL(34.55%);<br>VS(2.74%);<br>FCD(43.33%);<br>WSD(2.35%);<br>CR(78.95%) | STOP(10.87%);<br>DEP(88.24%);<br>GL(32.73%);<br>VS(2.05%);<br>FCD(46.67%);<br>WSD(2.35%);<br>CR(84.21%) | STOP(2.17%);<br>DEP(41.18%);<br>GL(21.82%);<br>VS(1.37%);<br>FCD(40.00%);<br>WSD(2.35%);<br>CR(84.21%) |

STOP, stopping; FRON, fronting; BACK, backing; DEP, depalatalization; PAL, palatalization; DEV, devoicing; GS, gliding substitution; GL, gliding of liquids; VS, vowel substitution; DN, denasalization; FCD, final consonant deletion; WSD, weak syllable deletion; CR, cluster reduction; IS, intra-syllabic metathesis; MN, monotongation.

*Table S1.2 - DR individual PCC, phonetic inventory and percentage of occurrence of phonological processes*

|                        | T1                                                                                                                                                    | T2                                                                                                                                                                  | T3                                                                                                                                    |
|------------------------|-------------------------------------------------------------------------------------------------------------------------------------------------------|---------------------------------------------------------------------------------------------------------------------------------------------------------------------|---------------------------------------------------------------------------------------------------------------------------------------|
| PCC                    | 52.06%                                                                                                                                                | 51.03%                                                                                                                                                              | 76.80%                                                                                                                                |
| Phonetic Inventory     | /b, p, d, g, k, m, n, ɲ, ʀ, ʀ/                                                                                                                        | Nothing added                                                                                                                                                       | Added /f, v, s, z, ʃ, ʒ, l, ʀ/                                                                                                        |
| Phonological processes | STOP(58.70%);<br>BACK(76.92%);<br>PAL(16.67%);<br>GL(25.45%);<br>GS(1.82%);<br>VS(0.68%);<br>DN(11.11%);<br>FCD(36.67%);<br>WSD(3.53%);<br>CR(78.95%) | STOP(58.70%);<br>BACK(76.92%);<br>FRON(3.33%);<br>DEV(5.00%);<br>GS(1.82%);<br>GL(27.27%);<br>VS(1.37%);<br>IS(2.63%);<br>FCD(20.00%);<br>WSD(3.53%);<br>CR(89.47%) | STOP(4.35%);<br>BACK(73.08%);<br>PAL(41.67%);<br>DEV(7.50%);<br>GL(23.64%);<br>IS(2.63%);<br>FCD(3.33%);<br>WSD(1.18%);<br>CR(10.53%) |

STOP, stopping; FRON, fronting; BACK, backing; DEP, depalatalization; PAL, palatalization; DEV, devoicing; GS, gliding substitution; GL, gliding of liquids; VS, vowel substitution; DN, denasalization; FCD, final consonant deletion; WSD, weak syllable deletion; CR, cluster reduction; IS, intra-syllabic metathesis; MN, monotongation.

*Table S1.3 - FC individual PCC, phonetic inventory and percentage of occurrence of phonological processes*

|                        | T1                                                                                                                     | T2                                                                                                                       | T3                                                                                       |
|------------------------|------------------------------------------------------------------------------------------------------------------------|--------------------------------------------------------------------------------------------------------------------------|------------------------------------------------------------------------------------------|
| PCC                    | 69.59%                                                                                                                 | 69.07%                                                                                                                   | 82.05%                                                                                   |
| Phonetic Inventory     | /b, p, d, t, g, k, v, f, s, m, n, ɲ, r, ɾ/                                                                             | Nothing added                                                                                                            | Added /ʃ, l, ʌ/                                                                          |
| Phonological processes | STOP(8.70%);<br>DEP(94.12%);<br>DEV(15.00%);<br>GL(38.18%);<br>VS(2.05%);<br>FCD(20.00%);<br>WSD(3.53%);<br>CR(15.79%) | STOP(13.04%);<br>DEV(17.50%);<br>DEP(100.00%);<br>GL(41.82%);<br>VS(1.37%);<br>FCD(16.67%);<br>WSD(3.53%);<br>CR(15.79%) | STOP(4.26%);<br>DEP(94.12%);<br>DEV(17.07%);<br>GL(18.18%);<br>VS(1.38%);<br>WSD(1.18%); |

STOP, stopping; FRON, fronting; BACK, backing; DEP, depalatalization; PAL, palatalization; DEV, devoicing; GS, gliding substitution; GL, gliding of liquids; VS, vowel substitution; DN, denasalization; FCD, final consonant deletion; WSD, weak syllable deletion; CR, cluster reduction; IS, intra-syllabic metathesis; MN, monotongation.

*Table S1.4 - GP individual PCC, phonetic inventory and percentage of occurrence of phonological processes*

|                        | T1                                                                                                                                     | T2                                                                                                                                                                                     | T3                                                                                     |
|------------------------|----------------------------------------------------------------------------------------------------------------------------------------|----------------------------------------------------------------------------------------------------------------------------------------------------------------------------------------|----------------------------------------------------------------------------------------|
| PCC                    | 42.27%                                                                                                                                 | 48.45%                                                                                                                                                                                 | 73.71%                                                                                 |
| Phonetic Inventory     | /b, p, d, t, g, k, v, f, ʃ, ʒ, m, n, ɲ/                                                                                                | Added /s/                                                                                                                                                                              | Added /z, ʀ, l, ɾ/                                                                     |
| Phonological processes | STOP(4.35%);<br>FRON(6.67%);<br>PAL(58.33%);<br>GL(30.91%);<br>VS(1.37%);<br>MN(22.22%);<br>FCD(46.67%);<br>WSD(18.82%);<br>CR(89.47%) | STOP(6.52%);<br>FRON(3.33%);<br>BACK(11.54%);<br>DEP(11.76%);<br>PAL(66.67%);<br>DEV(5.00%);<br>GL(40.00%);<br>VS(1.37%);<br>MN(11.11%);<br>FCD(40.00%);<br>WSD(11.76%);<br>CR(84.21%) | PAL(16.67%);<br>GL(21.82%);<br>VS(0.68%);<br>FCD(40.00%);<br>WSD(5.88%);<br>CR(78.95%) |

STOP, stopping; FRON, fronting; BACK, backing; DEP, depalatalization; PAL, palatalization; DEV, devoicing; GS, gliding substitution; GL, gliding of liquids; VS, vowel substitution; DN, denasalization; FCD, final consonant deletion; WSD, weak syllable deletion; CR, cluster reduction; IS, intra-syllabic metathesis; MN, monotongation.

*Table S1.5 - SC individual PCC, phonetic inventory and percentage of occurrence of phonological processes*

|                        | T1                                                                                                                      | T2                                                                                                                    | T3                                                                                |
|------------------------|-------------------------------------------------------------------------------------------------------------------------|-----------------------------------------------------------------------------------------------------------------------|-----------------------------------------------------------------------------------|
| PCC                    | 59.28%                                                                                                                  | 67.81%                                                                                                                | 96.39%                                                                            |
| Phonetic Inventory     | /b, p, d, t, g, k, v, f, s, m, n, ɲ/                                                                                    | Added /ʃ/                                                                                                             | Added /z, ʒ, ʀ, l, ʎ/                                                             |
| Phonological processes | STOP(13.04%);<br>DEP(64.71%);<br>DEV(17.50%);<br>GL(63.64%);<br>VS(2.74%);<br>FCD(13.33%);<br>WSD(3.53%);<br>CR(68.42%) | STOP(17.39%);<br>DEV(17.50%);<br>GS(1.82%);<br>GL(43.64%);<br>VS(1.37%);<br>FCD(13.33%);<br>WSD(1.18%);<br>CR(73.68%) | GS(1.82%);<br>GL(3.64%);<br>VS(0.68%);<br>FCD(3.33%);<br>WSD(2.35%);<br>CR(5.26%) |

STOP, stopping; FRON, fronting; BACK, backing; DEP, depalatalization; PAL, palatalization; DEV, devoicing; GS, gliding substitution; GL, gliding of liquids; VS, vowel substitution; DN, denasalization; FCD, final consonant deletion; WSD, weak syllable deletion; CR, cluster reduction; IS, intra-syllabic metathesis; MN, monotongation.

*Table S1.6 - DB individual PCC, phonetic inventory and percentage of occurrence of phonological processes*

|                        | T1                                                                                                                  | T2                                                                     | T3                                                                                     |
|------------------------|---------------------------------------------------------------------------------------------------------------------|------------------------------------------------------------------------|----------------------------------------------------------------------------------------|
| PCC                    | 53.61%                                                                                                              | 56.19%                                                                 | 75.77%                                                                                 |
| Phonetic Inventory     | /b, p, d, t, g, k, m, n, l/                                                                                         | Added /ʎ/                                                              | Added /f, v, s, z, ʃ, ʒ, ɲ, ʀ/                                                         |
| Phonological processes | STOP(80.43%);<br>DEV(2.50%);<br>GL(9.09%);<br>GS(3.64%);<br>VS(0.68%);<br>FCD(43.33%);<br>WSD(4.71%);<br>CR(94.74%) | STOP(80.43%);<br>GL(9.09%);<br>FCD(33.33%);<br>WSD(4.71%);<br>CR(100%) | DEP(17.65%);<br>DEV(5.00%);<br>GL(9.09%);<br>FCD(40.00%);<br>WSD(3.53%);<br>CR(78.95%) |

STOP, stopping; FRON, fronting; BACK, backing; DEP, depalatalization; PAL, palatalization; DEV, devoicing; GS, gliding substitution; GL, gliding of liquids; VS, vowel substitution; DN, denasalization; FCD, final consonant deletion; WSD, weak syllable deletion; CR, cluster reduction; IS, intra-syllabic metathesis; MN, monotongation.

*Table S1.7 - JR individual PCC, phonetic inventory and percentage of occurrence of phonological processes*

|                        | T1                                                                                                                                                     | T2                                                                                                                                     | T3                                                                                     |
|------------------------|--------------------------------------------------------------------------------------------------------------------------------------------------------|----------------------------------------------------------------------------------------------------------------------------------------|----------------------------------------------------------------------------------------|
| PCC                    | 48.97%                                                                                                                                                 | 53.61%                                                                                                                                 | 72.16%                                                                                 |
| Phonetic Inventory     | /b, p, d, t, g, k, s, m, n, r/                                                                                                                         | Nothing added                                                                                                                          | Added /n, f, v, z, ʃ, ʒ, l/                                                            |
| Phonological processes | STOP(6.52%);<br>FRON(3.33%);<br>DEP(29.41%);<br>DEV(15.00%);<br>GL(30.91%);<br>VS(2.05%);<br>MN(11.11%);<br>FCD(36.67%);<br>WSD(17.65%);<br>CR(84.21%) | STOP(17.39%);<br>DEV(17.50%);<br>DEP(70.59%);<br>GL(30.91%);<br>VS(2.74%);<br>MN(11.11%);<br>FCD(46.67%);<br>WSD(5.88%);<br>CR(84.21%) | DEV(10.00%);<br>GL(20.00%);<br>VS(0.68%);<br>FCD(80.00%);<br>WSD(4.71%);<br>CR(89.47%) |

STOP, stopping; FRON, fronting; BACK, backing; DEP, depalatalization; PAL, palatalization; DEV, devoicing; GS, gliding substitution; GL, gliding of liquids; VS, vowel substitution; DN, denasalization; FCD, final consonant deletion; WSD, weak syllable deletion; CR, cluster reduction; IS, intra-syllabic metathesis; MN, monotongation.

*Table S1.8 - BF individual PCC, phonetic inventory and percentage of occurrence of phonological processes*

|                        | T1                                                                                                     | T2                                                                                    | T3                                                                    |
|------------------------|--------------------------------------------------------------------------------------------------------|---------------------------------------------------------------------------------------|-----------------------------------------------------------------------|
| PCC                    | 75.26%                                                                                                 | 84.54%                                                                                | 94.85%                                                                |
| Phonetic Inventory     | /b, p, d, t, g, k, v, f, s, z, m, n, ɲ, l, r, r/                                                       | Nothing added                                                                         | Added /ʃ, ʒ, ʎ/                                                       |
| Phonological processes | STOP(4.35%);<br>DEP(88.24%);<br>GL(14.55%);<br>VS(0.68%);<br>FCD(30.00%);<br>WSD(3.53%);<br>CR(68.42%) | DEP(88.24%);<br>GL(12.73%);<br>VS(1.37%);<br>FCD(20.00%);<br>WSD(3.53%);<br>CR(5.26%) | DEP(5.88%);<br>PAL(16.67%);<br>GL(5.45%);<br>FCD(6.67%);<br>CR(5.26%) |

STOP, stopping; FRON, fronting; BACK, backing; DEP, depalatalization; PAL, palatalization; DEV, devoicing; GS, gliding substitution; GL, gliding of liquids; VS, vowel substitution; DN, denasalization; FCD, final consonant deletion; WSD, weak syllable deletion; CR, cluster reduction; IS, intra-syllabic metathesis; MN, monotongation.

*Table S1.9 - NM individual PCC, phonetic inventory and percentage of occurrence of phonological processes*

|                        | T1                                                                                                     | T2                                                                                                                    | T3                                                                                      |
|------------------------|--------------------------------------------------------------------------------------------------------|-----------------------------------------------------------------------------------------------------------------------|-----------------------------------------------------------------------------------------|
| PCC                    | 64.43%                                                                                                 | 64.43%                                                                                                                | 73.20%                                                                                  |
| Phonetic Inventory     | /b, p, d, t, g, k, v, f, m, n, ʒ, ʃ, ʀ/                                                                | Nothing added                                                                                                         | Added /s, z, l/                                                                         |
| Phonological processes | STOP(2.17%);<br>PAL(100.00%);<br>DEV(2.50%);<br>GL(45.45%);<br>VS(1.37%);<br>FCD(1.18%);<br>CR(78.95%) | DEP(3.85%);<br>PAL(100.00%);<br>DEV(2.50%);<br>GL(43.64%);<br>VS(3.42%);<br>FCD(33.33%);<br>WSD(2.35%);<br>CR(78.95%) | DEP(23.53%);<br>GL(41.82%);<br>DEV(2.50%);<br>FCD(30.00%);<br>WSD(1.18%);<br>CR(68.42%) |

STOP, stopping; FRON, fronting; BACK, backing; DEP, depalatalization; PAL, palatalization; DEV, devoicing; GS, gliding substitution; GL, gliding of liquids; VS, vowel substitution; DN, denasalization; FCD, final consonant deletion; WSD, weak syllable deletion; CR, cluster reduction; IS, intra-syllabic metathesis; MN, monotongation.

*Table S1.10 - FM individual PCC, phonetic inventory and percentage of occurrence of phonological processes*

|                        | T1                                                                                                                                                                                 | T2                                                                                                                                                                   | T3                                                                                                                   |
|------------------------|------------------------------------------------------------------------------------------------------------------------------------------------------------------------------------|----------------------------------------------------------------------------------------------------------------------------------------------------------------------|----------------------------------------------------------------------------------------------------------------------|
| PCC                    | 48.45%                                                                                                                                                                             | 52.58%                                                                                                                                                               | 68.56%                                                                                                               |
| Phonetic Inventory     | /b, p, d, t, g, k, s, ʃ, ʌ, m, n, ɲ/                                                                                                                                               | Nothing added                                                                                                                                                        | Added /f, v, ʀ/                                                                                                      |
| Phonological processes | STOP(19.57%);<br>BACK(3.85%);<br>DEP(47.06%);<br>DEV(47.50%);<br>GL(20.00%);<br>GS(5.45%);<br>VS(2.74%);<br>MN(11.11%);<br>IS(2.63%);<br>FCD(46.67%);<br>WSD(2.35%);<br>CR(89.47%) | STOP(21.74%);<br>BACK(3.85%);<br>DEP(23.53%);<br>DEV(40.00%);<br>GS(3.64%);<br>GL(36.36%);<br>VS(6.16%);<br>MN(11.11%);<br>FCD(36.67%);<br>WSD(3.53%);<br>CR(89.47%) | STOP(4.35%);<br>DEV(20.00%);<br>GL(1.82%);<br>VS(2.05%);<br>MN(11.11%);<br>FCD(40.00%);<br>WSD(4.71%);<br>CR(89.47%) |

STOP, stopping; FRON, fronting; BACK, backing; DEP, depalatalization; PAL, palatalization; DEV, devoicing; GS, gliding substitution; GL, gliding of liquids; VS, vowel substitution; DN, denasalization; FCD, final consonant deletion; WSD, weak syllable deletion; CR, cluster reduction; IS, intra-syllabic metathesis; MN, monotongation.

*Table S1.11 - LS individual PCC, phonetic inventory and percentage of occurrence of phonological processes*

|                        | T1                                                                                                                                                                  | T2                                                                                                                                      | T3                                                                                                                                     |
|------------------------|---------------------------------------------------------------------------------------------------------------------------------------------------------------------|-----------------------------------------------------------------------------------------------------------------------------------------|----------------------------------------------------------------------------------------------------------------------------------------|
| PCC                    | 43.81%                                                                                                                                                              | 45.36%                                                                                                                                  | 73.20%                                                                                                                                 |
| Phonetic Inventory     | /b, p, d, t, v, m, n, ɲ, ʃ, l/                                                                                                                                      | Added /r/                                                                                                                               | Added /k, g, f, s, z/                                                                                                                  |
| Phonological processes | STOP(47.83%);<br>FRON(60.00%);<br>PAL(8.33%);<br>DEV(7.50%);<br>GS(12.73%);<br>GL(9.09%);<br>VS(2.05%);<br>MN(11.11%);<br>FCD(43.33%);<br>WSD(2.35%);<br>CR(89.47%) | STOP(50.00%);<br>FRON(33.33%);<br>DEP(23.53%);<br>PAL(8.33%);<br>DEV(17.50%);<br>GS(5.45%);<br>GL(12.73%);<br>VS(2.05%);<br>DN(33.33%); | FRON(10.00%);<br>BACK(3.85%);<br>DEP(23.53%);<br>DEV(10.00%);<br>GS(7.27%);<br>VS(0.68%);<br>FCD(40.00%);<br>WSD(2.35%);<br>CR(73.68%) |

STOP, stopping; FRON, fronting; BACK, backing; DEP, depalatalization; PAL, palatalization; DEV, devoicing; GS, gliding substitution; GL, gliding of liquids; VS, vowel substitution; DN, denasalization; FCD, final consonant deletion; WSD, weak syllable deletion; CR, cluster reduction; IS, intra-syllabic metathesis; MN, monotongation.

#### Participants in the Tablet Intervention

*Table S1.12 - SI individual PCC, phonetic inventory and percentage of occurrence of phonological processes*

|                        | T1                                                                                                                                                      | T2                                                                                                                                                                     | T3                                                                                                                                                    |
|------------------------|---------------------------------------------------------------------------------------------------------------------------------------------------------|------------------------------------------------------------------------------------------------------------------------------------------------------------------------|-------------------------------------------------------------------------------------------------------------------------------------------------------|
| PCC                    | 47.94%                                                                                                                                                  | 53.61%                                                                                                                                                                 | 69.59%                                                                                                                                                |
| Phonetic Inventory     | /b, p, d, t, g, k, v, f, s, m, n, ɲ, r/                                                                                                                 | Nothing added                                                                                                                                                          | Added /r, l/                                                                                                                                          |
| Phonological processes | STOP(17.39%);<br>FRON(3.33%);<br>BACK(23.08%);<br>DEP(70.59%);<br>GL(32.73%);<br>VS(4.11%);<br>DN(11.11%);<br>FCD(43.33%);<br>WSD(7.06%);<br>CR(84.21%) | STOP(19.57%);<br>FRON(3.33%);<br>BACK(3.85%);<br>DEP(82.35%);<br>DEV(17.50%);<br>GL(34.55%);<br>VS(4.11%);<br>DN(11.11%);<br>FCD(40.00%);<br>WSD(5.88%);<br>CR(84.21%) | STOP(4.35%);<br>BACK(3.85%);<br>DEP(88.24%);<br>DEV(17.50%);<br>GL(27.27%);<br>VS(2.05%);<br>DN(11.11%);<br>FCD(30.00%);<br>WSD(4.71%);<br>CR(42.11%) |

STOP, stopping; FRON, fronting; BACK, backing; DEP, depalatalization; PAL, palatalization; DEV, devoicing; GS, gliding substitution; GL, gliding of liquids; VS, vowel substitution; DN, denasalization; FCD, final consonant deletion; WSD, weak syllable deletion; CR, cluster reduction; IS, intra-syllabic metathesis; MN, monotongation.

*Table S1.13 - SF individual PCC, phonetic inventory and percentage of occurrence of phonological processes*

|                        | T1                                                                                                                                                                     | T2                                                                                                                                                    | T3                                                                                                     |
|------------------------|------------------------------------------------------------------------------------------------------------------------------------------------------------------------|-------------------------------------------------------------------------------------------------------------------------------------------------------|--------------------------------------------------------------------------------------------------------|
| PCC                    | 61.34%                                                                                                                                                                 | 60.31%                                                                                                                                                | 74.74%                                                                                                 |
| Phonetic Inventory     | /b, p, d, t, g, k, v, f, s, m, n, ɲ, ʃ, r/                                                                                                                             | Nothing added                                                                                                                                         | Added /l, ɾ/                                                                                           |
| Phonological processes | STOP(13.04%);<br>BACK(3.85%);<br>DEP(29.41%);<br>PAL(58.33%);<br>GL(34.55%);<br>DEV(15.00%);<br>VS(2.05%);<br>DN(11.11%);<br>FCD(26.67%);<br>WSD(3.53%);<br>CR(84.21%) | STOP(15.22%);<br>DEP(64.71%);<br>PAL(8.33%);<br>DEV(15.00%);<br>GL(32.73%);<br>VS(2.05%);<br>DN(11.11%);<br>FCD(33.33%);<br>WSD(2.35%);<br>CR(84.21%) | DEP(23.53%);<br>DEV(17.50%);<br>GL(20.00%);<br>VS(1.37%);<br>FCD(30.00%);<br>WSD(2.35%);<br>CR(78.95%) |

STOP, stopping; FRON, fronting; BACK, backing; DEP, depalatalization; PAL, palatalization; DEV, devoicing; GS, gliding substitution; GL, gliding of liquids; VS, vowel substitution; DN, denasalization; FCD, final consonant deletion; WSD, weak syllable deletion; CR, cluster reduction; IS, intra-syllabic metathesis; MN, monotongation.

*Table S1.14 - DU individual PCC, phonetic inventory and percentage of occurrence of phonological processes*

|                        | T1                                                                                                                                                    | T2                                                                                                                                                                                     | T3                                                                                                                                                                 |
|------------------------|-------------------------------------------------------------------------------------------------------------------------------------------------------|----------------------------------------------------------------------------------------------------------------------------------------------------------------------------------------|--------------------------------------------------------------------------------------------------------------------------------------------------------------------|
| PCC                    | 54.12%                                                                                                                                                | 54.06%                                                                                                                                                                                 | 69.59%                                                                                                                                                             |
| Phonetic Inventory     | /b, p, d, t, g, k, v, f, s, ʃ, m, n/                                                                                                                  | Nothing added                                                                                                                                                                          | Added /l, ɾ/                                                                                                                                                       |
| Phonological processes | STOP(13.04%);<br>BACK(3.85%);<br>DEP(64.71%);<br>DEV(17.50%);<br>GL(30.91%);<br>GS(1.82%);<br>VS(2.05%);<br>FCD(66.67%);<br>WSD(3.53%);<br>CR(84.21%) | STOP(10.87%);<br>FRON(3.33%);<br>BACK(4.85%);<br>DEP(58.82%);<br>PAL(16.67%);<br>DEV(27.50%);<br>GL(25.45%);<br>VS(4.11%);<br>MN(22.22%);<br>FCD(60.00%);<br>WSD(7.06%);<br>CR(84.21%) | STOP(6.52%);<br>FRON(3.33%);<br>DEP(23.53%);<br>GS(5.45%);<br>GL(3.64%);<br>DEV(17.50%);<br>VS(2.05%);<br>MN(11.11%);<br>FCD(46.67%);<br>WSD(4.71%);<br>CR(68.42%) |

STOP, stopping; FRON, fronting; BACK, backing; DEP, depalatalization; PAL, palatalization; DEV, devoicing; GS, gliding substitution; GL, gliding of liquids; VS, vowel substitution; DN, denasalization; FCD, final consonant deletion; WSD, weak syllable deletion; CR, cluster reduction; IS, intra-syllabic metathesis; MN, monotongation.

*Table S1.15 - GO individual PCC, phonetic inventory and percentage of occurrence of phonological processes*

|                        | T1                                                                                    | T2                                                                                      | T3                                                                                     |
|------------------------|---------------------------------------------------------------------------------------|-----------------------------------------------------------------------------------------|----------------------------------------------------------------------------------------|
| PCC                    | 69.59%                                                                                | 71.13%                                                                                  | 79.90%                                                                                 |
| Phonetic Inventory     | /b, p, d, t, g, k, v, f, z, s, ʒ, ʃ, m, n, ɲ/                                         | Added /ɾ, ʀ/                                                                            | Added /l, ʎ/                                                                           |
| Phonological processes | STOP(8.70%);<br>GL(7.27%);<br>VS(1.37%);<br>FCD(33.33%);<br>WSD(3.53%);<br>CR(73.27%) | STOP(15.22%);<br>GL(12.73%);<br>VS(2.05%);<br>FCD(36.67%);<br>WSD(3.53%);<br>CR(57.89%) | STOP(4.53%);<br>GL(10.91%);<br>VS(0.68%);<br>FCD(33.33%);<br>WSD(2.35%);<br>CR(52.63%) |

STOP, stopping; FRON, fronting; BACK, backing; DEP, depalatalization; PAL, palatalization; DEV, devoicing; GS, gliding substitution; GL, gliding of liquids; VS, vowel substitution; DN, denasalization; FCD, final consonant deletion; WSD, weak syllable deletion; CR, cluster reduction; IS, intra-syllabic metathesis; MN, monotongation.

*Table S1.16 - RA individual PCC, phonetic inventory and percentage of occurrence of phonological processes*

|                        | T1                                                                                                                                                                       | T2                                                                                                                                                      | T3                                                                                       |
|------------------------|--------------------------------------------------------------------------------------------------------------------------------------------------------------------------|---------------------------------------------------------------------------------------------------------------------------------------------------------|------------------------------------------------------------------------------------------|
| PCC                    | 51.03%                                                                                                                                                                   | 63.40%                                                                                                                                                  | 71.65%                                                                                   |
| Phonetic Inventory     | /b, p, d, t, k, v, f, ʃ, m, n/                                                                                                                                           | Added /g, ɲ, ɾ, ʎ/                                                                                                                                      | Added /s, z, ʀ, l/                                                                       |
| Phonological processes | STOP(13.04%);<br>FRON(33.33%);<br>BACK(3.85%);<br>DEP(29.41%);<br>PAL(41.47%);<br>DEV(17.50%);<br>GL(32.73%);<br>VS(2.05%);<br>FCD(33.30%);<br>WSD(4.71%);<br>CR(94.74%) | STOP(15.22%);<br>FRON(10.00%);<br>BACK(3.85%);<br>PAL(91.67%);<br>DEV(17.50%);<br>GS(1.82%);<br>VS(2.05%);<br>FCD(30.00%);<br>WSD(4.71%);<br>CR(78.95%) | FRON(3.33%);<br>DEV(15.00%);<br>GL(32.73%);<br>FCD(36.67%);<br>WSD(3.53%);<br>CR(73.68%) |

STOP, stopping; FRON, fronting; BACK, backing; DEP, depalatalization; PAL, palatalization; DEV, devoicing; GS, gliding substitution; GL, gliding of liquids; VS, vowel substitution; DN, denasalization; FCD, final consonant deletion; WSD, weak syllable deletion; CR, cluster reduction; IS, intra-syllabic metathesis; MN, monotongation.



*Table S1.17 - TS individual PCC, phonetic inventory and percentage of occurrence of phonological processes*

|                           | T1                                                                                                                                | T2                                                                                     | T3                                                                       |
|---------------------------|-----------------------------------------------------------------------------------------------------------------------------------|----------------------------------------------------------------------------------------|--------------------------------------------------------------------------|
| PCC                       | 71.13%                                                                                                                            | 84.57%                                                                                 | 94.85%                                                                   |
| Phonetic Inventory        | /b, p, d, t, g, k, f, ʃ,<br>m, n, ɲ, r, l/                                                                                        | Added /k/                                                                              | Added /v, s, z, ʒ, r/                                                    |
| Phonological<br>processes | STOP(4.35%);<br>PAL(100%);<br>DEV(20.00%);<br>GL(25.45%);<br>GS(3.64%);<br>VS(1.37%);<br>FCD(6.67%);<br>WSD(3.53%);<br>CR(89.47%) | STOP(2.17%);<br>PAL(100%);<br>DEV(17.50%);<br>VS(1.37%);<br>FCD(3.33%);<br>WSD(3.53%); | DEP(11.76%);<br>PAL(25.00%);<br>DEV(2.50%);<br>GL(7.27%);<br>WSD(2.35%); |

STOP, stopping; FRON, fronting; BACK, backing; DEP, depalatalization; PAL, palatalization; DEV, devoicing; GS, gliding substitution; GL, gliding of liquids; VS, vowel substitution; DN, denasalization; FCD, final consonant deletion; WSD, weak syllable deletion; CR, cluster reduction; IS, intra-syllabic metathesis; MN, monotongation.

*Table S1.18 - RD individual PCC, phonetic inventory and percentage of occurrence of phonological processes*

| RD - Tablet               | T1                                                                                                                                                  | T2                                                                                                                                                  | T3                                                                                                                                    |
|---------------------------|-----------------------------------------------------------------------------------------------------------------------------------------------------|-----------------------------------------------------------------------------------------------------------------------------------------------------|---------------------------------------------------------------------------------------------------------------------------------------|
| PCC                       | 45.88%                                                                                                                                              | 48.97%                                                                                                                                              | 65.46%                                                                                                                                |
| Phonetic Inventory        | /p, t, k, b, d, g, m, n,<br>v, l, r/                                                                                                                | Nothing added                                                                                                                                       | Added /f, s, ʃ, ʀ/                                                                                                                    |
| Phonological<br>processes | STOP(28.26%);<br>FRON(10.00%);<br>GS(9.09%);<br>GL(1.82%);<br>FCD(70.00%);<br>WSD(4.71%);<br>CR(89.47%);<br>MN(33.33%);<br>VS(3.42%);<br>DN(33.33%) | STOP(28.26%);<br>FRON(10.00%);<br>GS(9.09%);<br>GL(1.82%);<br>FCD(70.00%);<br>WSD(7.06%);<br>CR(89.47%);<br>VS(3.42%);<br>DN(22.22%);<br>MN(33.33%) | STOP(4.35%);<br>BACK(3.85%);<br>PAL(75.00%);<br>DEV(12.50%);<br>GS(5.45%);<br>GL(3.64%);<br>FCD(50.00%);<br>CR(89.47%);<br>WSD(5.88%) |

STOP, stopping; FRON, fronting; BACK, backing; DEP, depalatalization; PAL, palatalization; DEV, devoicing; GS, gliding substitution; GL, gliding of liquids; VS, vowel substitution; DN, denasalization; FCD, final consonant deletion; WSD, weak syllable deletion; CR, cluster reduction; IS, intra-syllabic metathesis; MN, monotongation.

*Table S1.19 - RP individual PCC, phonetic inventory and percentage of occurrence of phonological processes*

|                        | T1                                                                                                                      | T2                                                                                                                      | T3                                                                                                                |
|------------------------|-------------------------------------------------------------------------------------------------------------------------|-------------------------------------------------------------------------------------------------------------------------|-------------------------------------------------------------------------------------------------------------------|
| PCC                    | 69.07%                                                                                                                  | 64.43%                                                                                                                  | 89.69%                                                                                                            |
| Phonetic Inventory     | /b, p, d, t, g, k, v, f, s, m, n, ɲ, l, r/                                                                              | Nothing added                                                                                                           | Added /z, ʃ, ʒ, r/                                                                                                |
| Phonological processes | STOP(13.04%);<br>DEP(91.67%);<br>DEV(17.50%);<br>GL(10.91%);<br>VS(1.37%);<br>FCD(36.67%);<br>WSD(1.18%);<br>CR(84.21%) | STOP(17.39%);<br>DEP(94.12%);<br>DEV(17.50%);<br>GL(12.63%);<br>VS(2.05%);<br>FCD(33.33%);<br>WSD(1.18%);<br>CR(89.47%) | DEP(5.88%);<br>PAL(8.33%);<br>DEV(7.50%);<br>GL(9.09%);<br>VS(0.68%);<br>FCD(6.67%);<br>WSD(1.18%);<br>CR(36.84%) |

STOP, stopping; FRON, fronting; BACK, backing; DEP, depalatalization; PAL, palatalization; DEV, devoicing; GS, gliding substitution; GL, gliding of liquids; VS, vowel substitution; DN, denasalization; FCD, final consonant deletion; WSD, weak syllable deletion; CR, cluster reduction; IS, intra-syllabic metathesis; MN, monotongation.

*Table S1.20 - DV individual PCC, phonetic inventory and percentage of occurrence of phonological processes*

|                        | T1                                                                                                                                       | T2                                                                                                                                                                   | T3                                                                                      |
|------------------------|------------------------------------------------------------------------------------------------------------------------------------------|----------------------------------------------------------------------------------------------------------------------------------------------------------------------|-----------------------------------------------------------------------------------------|
| PCC                    | 60.82%                                                                                                                                   | 66.49%                                                                                                                                                               | 86.60%                                                                                  |
| Phonetic Inventory     | /b, p, d, t, g, k, m, n, ɲ, f, v, s, r, l/                                                                                               | Nothing added                                                                                                                                                        | Added /ʃ, ʒ, l/                                                                         |
| Phonological processes | STOP(13.04%);<br>FRON(6.67%);<br>DEP(100.00%);<br>DEV(17.50%);<br>GL(36.36%);<br>VS(2.74%);<br>FCD(30.00%);<br>WSD(2.35%);<br>CR(84.21%) | STOP(17.39%);<br>FRON(3.33%);<br>DEP(100.00%);<br>DEV(17.50%);<br>GL(34.55%);<br>VS(2.74%);<br>DN(11.11%);<br>FCD(6.67%);<br>WSD(2.35%);<br>CR(21.05%);<br>IS(2.63%) | FRON(3.33%);<br>DEP(11.76%);<br>DEV(15.00%);<br>GL(25.45%);<br>VS(0.68%);<br>WSD(1.18%) |

STOP, stopping; FRON, fronting; BACK, backing; DEP, depalatalization; PAL, palatalization; DEV, devoicing; GS, gliding substitution; GL, gliding of liquids; VS, vowel substitution; DN, denasalization; FCD, final consonant deletion; WSD, weak syllable deletion; CR, cluster reduction; IS, intra-syllabic metathesis; MN, monotongation.

*Table S1.21 - GM individual PCC, phonetic inventory and percentage of occurrence of phonological processes*

|                        | T1                                                                                                     | T2                                                                                      | T3                                       |
|------------------------|--------------------------------------------------------------------------------------------------------|-----------------------------------------------------------------------------------------|------------------------------------------|
| PCC                    | 65.98%                                                                                                 | 68.04%                                                                                  | 97.94%                                   |
| Phonetic Inventory     | /b, p, d, t, g, k, v, f, s, m, n, ɲ, ʃ, ʎ, ʀ/                                                          | Added /r/                                                                               | Added /z, ʒ, l/                          |
| Phonological processes | STOP(2.17%);<br>DEV(30.00%);<br>GL(43.64%);<br>VS(1.37%);<br>FCD(33.33%);<br>WSD(2.35%);<br>CR(78.95%) | DEP(5.88%);<br>DEV(37.50%);<br>GL(43.64%);<br>FCD(30.00%);<br>WSD(2.35%);<br>CR(47.37%) | DEV(5.00%);<br>GL(1.82%);<br>FCD(3.33%); |

STOP, stopping; FRON, fronting; BACK, backing; DEP, depalatalization; PAL, palatalization; DEV, devoicing; GS, gliding substitution; GL, gliding of liquids; VS, vowel substitution; DN, denasalization; FCD, final consonant deletion; WSD, weak syllable deletion; CR, cluster reduction; IS, intra-syllabic metathesis; MN, monotongation.

*Table S1.22 - JS individual PCC, phonetic inventory and percentage of occurrence of phonological processes*

|                        | T1                                                                                     | T2                                                                                                     | T3                                                      |
|------------------------|----------------------------------------------------------------------------------------|--------------------------------------------------------------------------------------------------------|---------------------------------------------------------|
| PCC                    | 64.95%                                                                                 | 64.43%                                                                                                 | 78.35%                                                  |
| Phonetic Inventory     | /b, p, d, t, g, k, v, f, s, z, m, n, ɲ, ʃ, ʒ, ʀ/                                       | Nothing added                                                                                          | Added /l, r/                                            |
| Phonological processes | STOP(6.52%);<br>GL(23.64%);<br>VS(2.05%);<br>FCD(80.00%);<br>WSD(7.06%);<br>CR(89.47%) | STOP(15.22%);<br>DEP(5.88%);<br>GL(23.64%);<br>VS(0.68%);<br>FCD(80.00%);<br>WSD(89.47%);<br>CR(5.88%) | GL(10.91%);<br>VS(0.68%);<br>FCD(43.33%);<br>CR(78.95%) |

STOP, stopping; FRON, fronting; BACK, backing; DEP, depalatalization; PAL, palatalization; DEV, devoicing; GS, gliding substitution; GL, gliding of liquids; VS, vowel substitution; DN, denasalization; FCD, final consonant deletion; WSD, weak syllable deletion; CR, cluster reduction; IS, intra-syllabic metathesis; MN, monotongation.
